# Supplementary material
Source: publisher site journal article supplement (http://www.dovepress.com/get_supplementary_file.php?f=296406.docx)
Supplement: Supplementary file 1 [file get_supplementary_file.php]

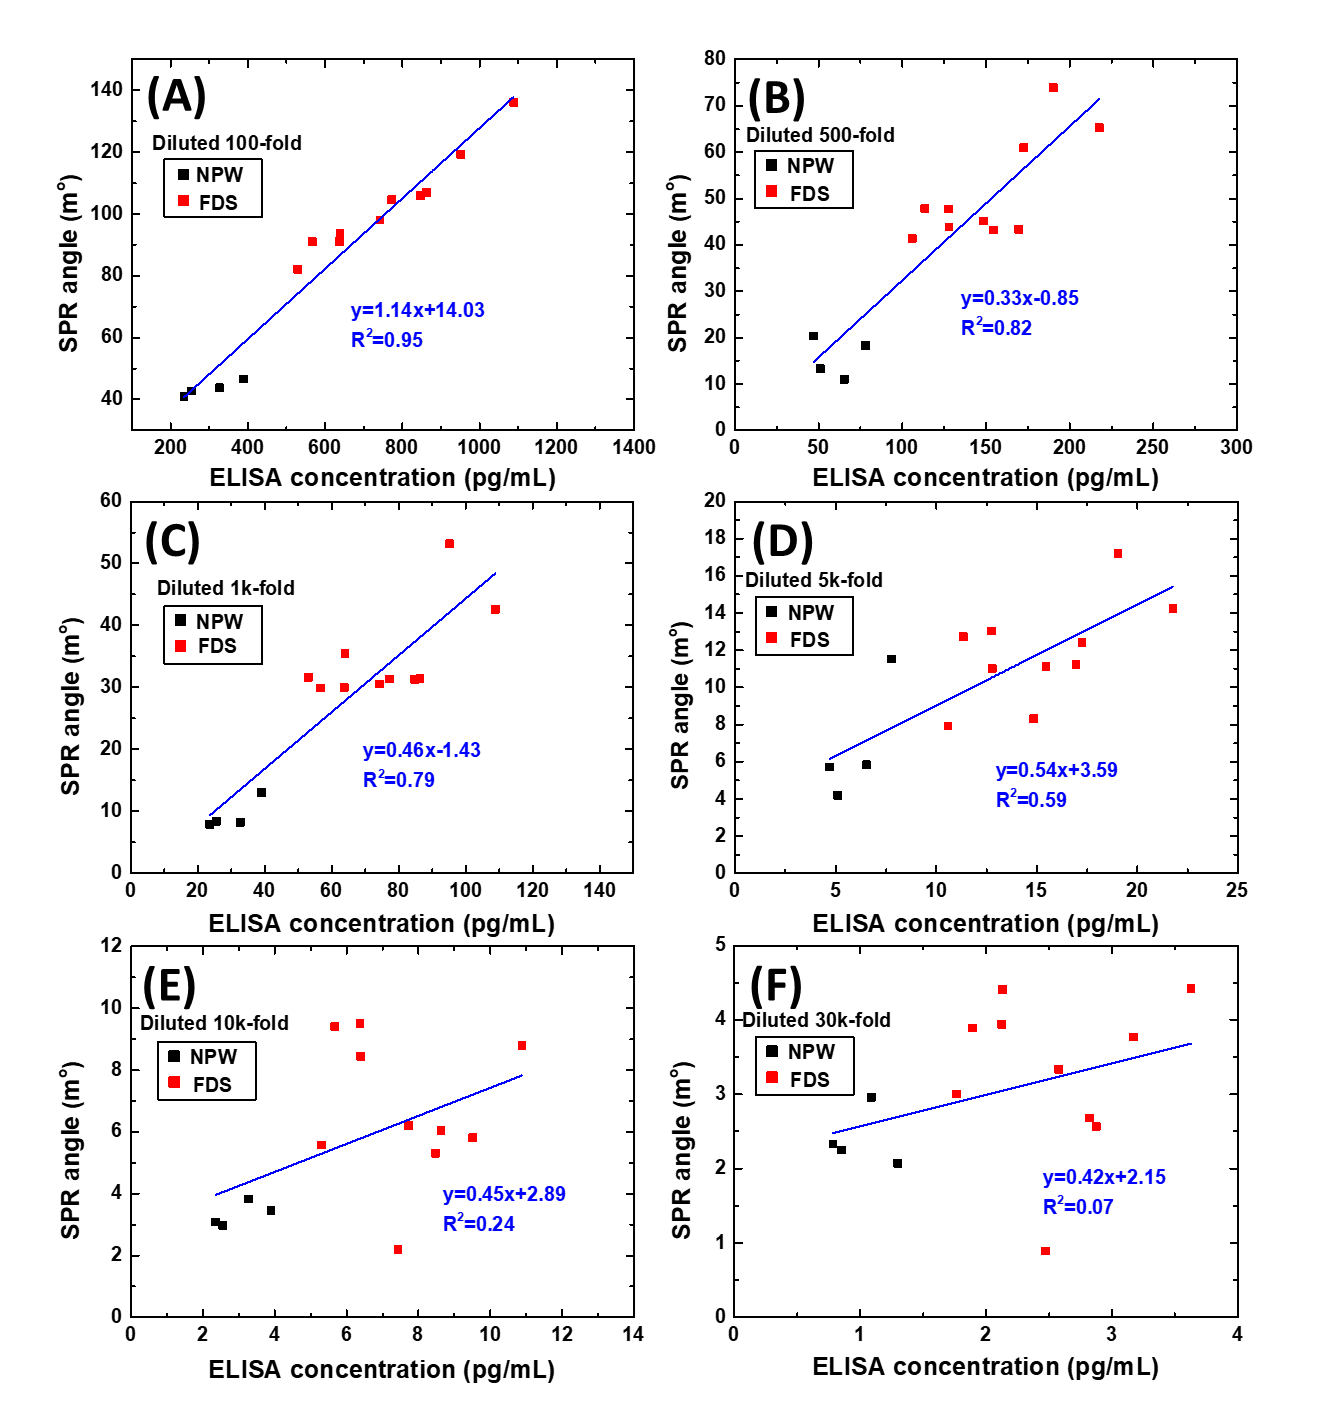


**Figure S1**. Correlations between the SPR biosensor and ELISA results for different maternal serum dilution factors in PAPP-A2 protein assay. (a) 100-fold, (b) 500-fold, (c) 1k-fold, (d) 5k-fold, (e) 10k-fold, and (f) 30k-fold.

**Abbreviations:** SPR, surface plasmon resonance; ELISA, Enzyme-linked immunosorbent assay; PAPP-A2, pregnancy-associated plasma protein-A2.

| fetal Down’s syndrome (FDS) group | | | | | | | | | | | | | | | | | | | | |
| --- | --- | --- | --- | --- | --- | --- | --- | --- | --- | --- | --- | --- | --- | --- | --- | --- | --- | --- | --- | --- |
| **Dilution factors** | **FDS-1 (19W)** | | **FDS-2 (20W)** | | **FDS-3 (14W)** | | **FDS-4 (14W)** | | **FDS-5 (22W)** | | **FDS-6 (19W)** | | **FDS-7 (21W)** | | **FDS-8 (18W)** | | **FDS-9 (19W)** | | **FDS-10 (18W)** | |
| **MA: 34**  **(MT=1)** | | **MA: 43**  **(MT=0)** | | **MA: 39**  **(MT=0)** | | **MA: 31**  **(MT=0)** | | **MA: 39**  **(MT=2)** | | **MA: 37**  **(MT=1)** | | **MA: 43**  **(MT=2)** | | **MA: 36**  **(MT=2)** | | **MA: 40**  **(MT=2)** | | **MA: 30**  **(MT=1)** | |
| C(B) | θSPR | C(B) | θSPR | C(B) | θSPR | C(B) | θSPR | C(B) | θSPR | C(B) | θSPR | C(B) | θSPR | C(B) | θSPR | C(B) | θSPR | C(B) | θSPR |
| **100-fold** | 951.50 | 119.24 | 847.45 | 105.98 | 742.69 | 98.02 | 1088.36 | 136.14 | 862.60 | 106.93 | 639.20 | 93.61 | 567.40 | 91.05 | 772.80 | 104.59 | 529.58 | 82.12 | 637.38 | 91.14 |
| **500-fold** | 190.30 | 73.90 | 169.49 | 43.38 | 148.54 | 45.14 | 217.67 | 65.28 | 172.52 | 60.95 | 127.84 | 43.86 | 113.48 | 47.84 | 154.56 | 43.18 | 105.92 | 41.39 | 127.48 | 47.75 |
| **1K-fold** | 95.15 | 53.18 | 84.75 | 31.31 | 74.27 | 30.53 | 108.84 | 42.59 | 86.26 | 31.44 | 63.92 | 35.49 | 56.74 | 29.89 | 77.28 | 31.35 | 52.96 | 31.62 | 63.74 | 29.98 |
| **5K-fold** | 19.03 | 17.22 | 16.95 | 11.21 | 14.85 | 8.31 | 21.77 | 14.23 | 17.25 | 12.40 | 12.78 | 11.02 | 11.35 | 12.73 | 15.46 | 11.12 | 10.59 | 7.91 | 12.75 | 13.04 |
| **10K-fold** | 9.52 | 5.81 | 8.48 | 5.31 | 7.43 | 2.19 | 10.88 | 8.79 | 8.63 | 6.04 | 6.39 | 8.45 | 5.67 | 9.41 | 7.73 | 6.203 | 5.29 | 5.58 | 6.37 | 9.51 |
| **30K-fold** | 3.17 | 3.77 | 2.83 | 2.68 | 2.48 | 0.89 | 3.63 | 4.42 | 2.87 | 2.57 | 2.13 | 4.41 | 1.89 | 3.89 | 2.57 | 3.34 | 1.76 | 3.01 | 2.13 | 3.94 |
| **40K-fold** | 2.38 | 3.63 | 2.12 | 2.53 | 1.86 | 0.78 | 2.72 | 4.23 | 2.16 | 1.09 | 1.59 | 2.65 | 1.42 | 1.60 | 1.93 | 2.16 | 1.32 | 1.18 | 1.59 | 1.76 |
| MA: maternal age  MT: miscarriage times  C(B): serum PAPP-A2 concentrations (pg/mL).  θSPR: SPR angle shift, millidegrees (mo). | | | | | | | | | | | | | | | | | | | | |

**Table S1 for FDS group**

**Table S2 for NPW group**

| normal pregnant women (NPW) group | | | | | | | | | |
| --- | --- | --- | --- | --- | --- | --- | --- | --- | --- |
| **Dilution factors** | **NPW-1 (14W)** | | **NPW-2 (12W)** | | **NPW-3 (14W)** | | **NPW-4 (16W)** | | |
| **MA: 30**  **(MT=0)** | | **MA: 27**  **(MT=0)** | | **MA: 30**  **(MT=0)** | | **MA: 34**  **(MT=0)** | | |
| C(B) | θSPR | C(B) | θSPR | C(B) | θSPR | C(B) | θSPR | |
| **100-fold** | 255.20 | 42.77 | 326.74 | 43.78 | 389.70 | 46.57 | 235.02 | 40.96 | |
| **500-fold** | 51.04 | 13.31 | 65.35 | 11.03 | 77.94 | 18.30 | 47.01 | 20.35 | |
| **1K-fold** | 25.52 | 8.38 | 32.67 | 8.24 | 38.97 | 13.01 | 23.50 | 7.89 | |
| **5K-fold** | 5.11 | 4.20 | 6.53 | 5.83 | 7.79 | 11.52 | 4.70 | 5.72 | |
| **10K-fold** | 2.55 | 2.98 | 3.27 | 3.83 | 3.89 | 3.45 | 2.35 | 3.08 | |
| **30K-fold** | 0.85 | 2.25 | 1.09 | 2.96 | 1.29 | 2.07 | 0.78 | 2.33 | |
| MA: maternal age  MT: miscarriage times  C(B): serum PAPP-A2 concentrations (pg/mL).  θSPR: SPR angle shift, millidegrees (mo). | | | | | | | | |
